# Supplementary material
Source: PubMed Central journal article supplement (PMC9892580)
Supplement: 41398_2023_2334_MOESM1_ESM.pdf [file 41398_2023_2334_MOESM1_ESM.pdf]

*Persistent short nighttime sleep duration is associated with a greater post-COVID risk in fully mRNA-vaccinated individuals (Supplement)*

**Table S1: Exclusions**

|                                                                                           |               |
|-------------------------------------------------------------------------------------------|---------------|
| <b>Total number of survey responses to ICOSS-2</b>                                        | <b>16 899</b> |
| Did not answer to the COVID-19 symptom list defined by core symptoms                      | 2837          |
| No report of sleep duration                                                               | 511           |
| Self-reported sleep duration <3h or >15h                                                  | 60            |
| No report on age                                                                          | 7             |
| No report on height                                                                       | 1824          |
| No report on weight                                                                       | 25            |
| No report on ethnicity                                                                    | 85            |
| No report on marital status                                                               | 13            |
| No report on educational status                                                           | 316           |
| No report on urban-rural classification                                                   | 4             |
| No report on smoking status                                                               | 156           |
| No report on alcohol consumption                                                          | 4             |
| No report on light, moderate, or high physical activity                                   | 315           |
| No report on SARS-CoV-2 vaccination information                                           | 3             |
| No report on disease history                                                              | 32            |
| No report on male or female gender                                                        | 3             |
| Other vaccines were administered than mRNA or participant was unclear about vaccine types | 987           |
| <b>Sample without any vaccine or with mRNA vaccine</b>                                    | <b>9717</b>   |
| Less than two shots                                                                       | 3734          |
| No report on time elapsed since first vaccination                                         | 65            |
| <b>Samples with 2 shots mRNA vaccine</b>                                                  | <b>5918</b>   |

*Persistent short nighttime sleep duration is associated with a greater post-COVID risk in fully mRNA-vaccinated individuals (Supplement)*

**Table S2:** Ethical approval data.

| <i>Country</i>    | <i>Ethical diary number</i>                | <i>Notes</i>                                                                                                                                                                                               |
|-------------------|--------------------------------------------|------------------------------------------------------------------------------------------------------------------------------------------------------------------------------------------------------------|
| Austria           | NA                                         | Due to the anonymous nature of survey collection, the Ethical Board of the Medical University of Vienna, Austria did not require an ethical evaluation or approval.                                        |
| Brazil            | NA                                         | Due to the anonymous nature of survey collection, the Regional Ethical Board did not require an ethical evaluation or approval.                                                                            |
| Bulgaria          | Protocol Number 46/05.08.2021              | Ethics Commission of the Institute of Neurobiology, Bulgarian Academy of Sciences                                                                                                                          |
| Canada            | 2020-151-A-1-R-1 21-05-2021<br>REB#20-5540 | The “Comité d’éthique de l’Université Laval » reviewed and approved this research protocol.<br>University Health Network Research Ethics Board, Toronto, Ontario, Canada                                   |
| China (Hong Kong) | 2020.277                                   | Joint Chinese University of Hong Kong-New Territories East Cluster Clinical Research Ethics Committee                                                                                                      |
| Croatia           | 100-21/21-4 (07.05.2021)                   | Ethics Committee of the Institute for Medical Research and Occupational Health                                                                                                                             |
| Finland           | NA                                         | Due to the anonymous nature of survey collection, the Regional Ethical Board did not require an ethical evaluation or approval.                                                                            |
| France            | NA                                         | Declaration has been made to the CNIL (Comité National Informatique et liberté).<br>Due to the anonymous nature of survey collection, the Ethical Board did not require an ethical evaluation or approval. |
| Germany           | EA1/162/20                                 | Ethics Committee of Charite University Hospital Berlin                                                                                                                                                     |
| Israel            | AU-HEA-MK-20210603                         | The study was approved by the Ariel University Human Research Ethics Committee of the Faculty of Health Sciences                                                                                           |
| Italy             | protocol number: 0000861, April 24, 2021   | Institutional Ethics Committee of the Department of Psychology of the Sapienza University of Rome                                                                                                          |
| Japan             | No. 198/2020                               | The ethics committee of the Neuropsychiatric Research Institute, Tokyo, Japan                                                                                                                              |
| Norway            | NA                                         | Due to the anonymous nature of survey collection, the Regional Ethical Board did not require an ethical evaluation or approval.                                                                            |
| Portugal          | CES-UCP n°142, May 27th, 2022              | The project was approved unanimously by the Life Sciences Ethical Commission of the Portuguese Catholic University.                                                                                        |
| Sweden            | NA                                         | Due to the anonymous nature of survey collection, the Regional Ethical Board did not require an ethical evaluation or approval.                                                                            |
| USA               | IRB-20-257                                 | Deemed exempt by the Mississippi State University Institutional Review Board.                                                                                                                              |

**Notes:** Informed consent was obtained where appropriate, and the procedures followed all principles stated by the Declaration of Helsinki.

*Abbreviations:* NA = non-applicable.

*Persistent short nighttime sleep duration is associated with a greater post-COVID risk in fully mRNA-vaccinated individuals (Supplement)*

**Table S3:** Calculation of the weekly physical activity level status

| Self-reported physical activity level (h/w) |                 |                 | Ranking | Score for the analysis |
|---------------------------------------------|-----------------|-----------------|---------|------------------------|
| <i>Light</i>                                | <i>Moderate</i> | <i>Vigorous</i> |         |                        |
| <2-3                                        | <2-3            | <2-3            | 1       | 0                      |
| ≥2-3                                        | <2-3            | <2-3            | 2       | 1                      |
| <2-3                                        | ≥2-3            | <2-3            | 3       | 2                      |
| <2-3                                        | <2-3            | ≥2-3            | 4       | 3                      |
| ≥2-3                                        | ≥2-3            | <2-3            | 5       | 4                      |
| ≥2-3                                        | <2-3            | ≥2-3            | 6       | 5                      |
| <2-3                                        | ≥2-3            | ≥2-3            | 7       | 6                      |
| ≥2-3                                        | ≥2-3            | ≥2-3            | 8       | 7                      |

Persistent short nighttime sleep duration is associated with a greater post-COVID risk in fully mRNA-vaccinated individuals (Supplement)

**Table S4:** ICOSS-2 characteristics, split by vaccination status

| Characteristic                           | Number of SARS-CoV-2 vaccinations                |             | Generalized LM            | Chi <sup>2</sup> -test       | P-value   |        |
|------------------------------------------|--------------------------------------------------|-------------|---------------------------|------------------------------|-----------|--------|
|                                          | Fewer than two                                   | Two         | df; Wald Chi <sup>2</sup> | df; Pearson Chi <sup>2</sup> |           |        |
| Responders, n (%)                        | 3734 (38.4)                                      | 5983 (61.6) | --                        | --                           | --        |        |
| Age, mean (SD)                           | 37.9 (14.7)                                      | 45.3 (17.4) | 1; 461.693                | --                           | <0.001    |        |
| Female, n (%)                            | 2760 (73.9)                                      | 3768 (63.0) | --                        | 2; 124.733                   | <0.001    |        |
| Ethnicity, n (%)                         |                                                  |             | --                        | 2; 978.433                   | <0.001    |        |
|                                          | <i>Caucasian/White</i>                           | 2918 (78.1) | 2950 (49.3)               |                              |           |        |
|                                          | <i>Asian</i>                                     | 482 (12.9)  | 2565 (42.9)               |                              |           |        |
|                                          | <i>other</i>                                     | 334 (8.9)   | 468 (7.8)                 |                              |           |        |
| Smoking status, n (%)                    |                                                  |             | --                        | 3; 38.812                    | <0.001    |        |
|                                          | <i>never or less than once per month</i>         | 2830 (75.8) | 4788 (80.0)               |                              |           |        |
|                                          | <i>less than once per week</i>                   | 129 (3.5)   | 153 (2.6)                 |                              |           |        |
|                                          | <i>1 - 5 days per week</i>                       | 165 (4.4)   | 154 (2.6)                 |                              |           |        |
|                                          | <i>every day or almost daily</i>                 | 610 (16.3)  | 888 (14.8)                |                              |           |        |
| Weekly alcohol consumption, n (%)        |                                                  |             | --                        | 2; 16.769                    | <0.001    |        |
|                                          | <i>not at all</i>                                | 1167 (31.3) | 2108 (35.2)               |                              |           |        |
|                                          | <i>moderate</i>                                  | 2457 (65.8) | 3695 (61.8)               |                              |           |        |
|                                          | <i>excessive</i>                                 | 110 (2.9)   | 180 (3.0)                 |                              |           |        |
| Weekly PAL score, mean (SD)              | 2.1 (2.4)                                        | 1.8 (2.3)   | 1; 34.663                 | --                           | <0.001    |        |
| Marital status, n (%)                    |                                                  |             | --                        | 2; 74.367                    | <0.001    |        |
|                                          | <i>single</i>                                    | 1460 (39.1) | 1831 (30.6)               |                              |           |        |
|                                          | <i>married /in relationship</i>                  | 1995 (53.4) | 3624 (60.6)               |                              |           |        |
|                                          | <i>divorced or separated/widowed</i>             | 279 (7.5)   | 528 (8.8)                 |                              |           |        |
| Living area, n (%)                       |                                                  |             | --                        | 1; 294.537                   | <0.001-   |        |
|                                          | <i>urban</i>                                     | 2783 (74.5) | 3431 (57.3)               |                              |           |        |
| BMI ≥ 30kg/m <sup>2</sup> , n (%)        | 639 (17.1)                                       | 769 (12.9)  | --                        | 1; 33.673                    | <0.001    |        |
| Highest education, n (%)                 |                                                  |             | --                        | 1; 0.940                     | 0.332     |        |
|                                          | <i>university, college or above</i>              | 2354 (63.0) | 3830 (64.0)               |                              |           |        |
| Habitual nighttime sleep duration, n (%) |                                                  |             | --                        | 2; 95.001                    | <0.001    |        |
|                                          | <i>less than 6 hours per night</i>               | 461 (12.3)  | 1003 (16.8)               |                              |           |        |
|                                          | <i>6-9 hours per night</i>                       | 3014 (80.7) | 4783 (79.9)               |                              |           |        |
|                                          | <i>more than 9 hours per night</i>               | 259 (6.9)   | 197 (3.3)                 |                              |           |        |
| Test-positive for SARS-CoV-2, n (%)      | 858 (23.0)                                       | 538 (9.0)   | --                        | 1; 365.549                   | <0.001    |        |
| Presence of                              |                                                  |             |                           |                              |           |        |
|                                          | <i>diseases of the circulatory system, n (%)</i> | 605 (16.2)  | 1257 (21.0)               | --                           | 1; 34.297 | <0.001 |

*Persistent short nighttime sleep duration is associated with a greater post-COVID risk in fully mRNA-vaccinated individuals (Supplement)*

|                                                                                         |             |             |    |            |        |
|-----------------------------------------------------------------------------------------|-------------|-------------|----|------------|--------|
| <i>diabetes mellitus, n (%)</i>                                                         | 585 (15.7)  | 952 (15.9)  | -- | 1; 0.104   | 0.748  |
| <i>diseases of respiratory system, n (%)</i>                                            | 424 (11.4)  | 580 (9.7)   | -- | 1; 6.846   | 0.009  |
| <i>neuropsychiatric disorders, n (%)</i>                                                | 1831 (49.0) | 2155 (36.0) | -- | 1; 161.024 | <0.001 |
| <i>other diseases, n (%)</i>                                                            | 1893 (50.7) | 2487 (41.6) | -- | 1; 77.385  | <0.001 |
| <i>hypertension, n (%)</i>                                                              | 432 (11.6)  | 1007 (16.8) | -- | 1; 50.453  | <0.001 |
| Post-COVID                                                                              | 1188 (31.8) | 1334 (22.3) | -- | 1; 108.406 | <0.001 |
| Experienced for at least three months                                                   |             |             |    |            |        |
| <i>shortness of breath or difficulty breathing and/or chest pain, n (%)<sup>A</sup></i> | 465 (12.5)  | 443 (7.4)   | -- | 1; 69.118  | <0.001 |
| <i>joint pain (arthralgia) and/or muscle pain, muscle aches, n (%)<sup>B</sup></i>      | 646 (17.3)  | 817 (13.7)  | -- | 1; 24.051  | <0.001 |
| <i>post-exertional malaise, n (%)<sup>C</sup></i>                                       | 576 (15.4)  | 549 (9.2)   | -- | 1; 87.552  | <0.001 |
| <i>problems of sweating and /or trouble of tolerating cold/heat, n (%)<sup>D</sup></i>  | 434 (11.6)  | 466 (7.8)   | -- | 1; 40.324  | <0.001 |
| <i>loss of smell and/or taste, n (%)<sup>E</sup></i>                                    | 269 (7.2)   | 185 (3.1)   | -- | 1; 87.188  | <0.001 |
| <i>feverishness and/or flu-like symptoms, n (%)<sup>F</sup></i>                         | 277 (7.4)   | 185 (3.1)   | -- | 1; 95.130  | <0.001 |

Group comparisons were performed by Chi-Square testing for categorical variables and generalized linear models for continuous variables. Missing data: <sup>A</sup> n=12; Missing data: <sup>B</sup> n=3; Missing data: <sup>C</sup> n=11; Missing data: <sup>D</sup> n=10; Missing data: <sup>E</sup> n=21; Missing data: <sup>F</sup> n=13. Abbreviations: df, degree of freedom; LM, linear model; PAL, physical activity level.

*Persistent short nighttime sleep duration is associated with a greater post-COVID risk in fully mRNA-vaccinated individuals (Supplement)*

**Table S5:** OR [95%-CI] for the association of confounders with post-COVID among those who received two doses of mRNA vaccines

| Confounder                                                                                          | Adjusted OR [95%-CI] |
|-----------------------------------------------------------------------------------------------------|----------------------|
| Age (continuous)                                                                                    | 1.03 [1.03, 1.04]    |
| Gender identity                                                                                     |                      |
| <i>Women</i>                                                                                        | 1.69 [1.42, 2.02]    |
| Ethnicity                                                                                           |                      |
| <i>Caucasian/White</i>                                                                              | 1                    |
| <i>Asian</i>                                                                                        | 0.37 [0.30, 0.45]    |
| <i>other</i>                                                                                        | 0.92 [0.71, 1.20]    |
| Smoking status                                                                                      |                      |
| <i>never or less than once per month</i>                                                            | 1                    |
| <i>less than once per week</i>                                                                      | 1.11 [0.70, 1.78]    |
| <i>1 - 5 days per week</i>                                                                          | 0.96 [0.61, 1.52]    |
| <i>every day or almost daily</i>                                                                    | 1.18 [0.96, 1.45]    |
| Weekly alcohol consumption                                                                          |                      |
| <i>Not at all</i>                                                                                   | 1                    |
| <i>Moderate</i>                                                                                     | 0.96 [0.82, 1.13]    |
| <i>Excessive</i>                                                                                    | 1.08 [0.69, 1.71]    |
| Weekly physical activity level status                                                               | 0.98 [0.94, 1.01]    |
| Marital status                                                                                      |                      |
| <i>Married /in relationship</i>                                                                     | 1                    |
| <i>Single</i>                                                                                       | 0.87 [0.72, 1.05]    |
| <i>Divorced or separated/widowed</i>                                                                | 0.90 [0.70, 1.15]    |
| Time elapsed since first mRNA vaccination                                                           |                      |
| <i>1-6 months</i>                                                                                   | 1                    |
| <i>&lt; 1 month</i>                                                                                 | 1.17 [0.77, 1.76]    |
| <i>&gt;6 month</i>                                                                                  | 1.02 [0.85, 1.23]    |
| Living area                                                                                         |                      |
| <i>Urban</i>                                                                                        | 1                    |
| <i>Rural</i>                                                                                        | 0.88 [0.75, 1.04]    |
| BMI $\geq$ 30kg/m <sup>2</sup>                                                                      | 1.10 [0.87, 1.40]    |
| Highest education                                                                                   |                      |
| <i>University, College or above</i>                                                                 | 1                    |
| <i>Primary/elementary/lower secondary school and secondary school/high school/vocational school</i> | 1.16 [0.99, 1.36]    |
| Test-positive for SARS-CoV-2                                                                        | 3.32 [2.65, 4.17]    |
| Presence of diseases of the circulatory system                                                      | 1.75 [1.26, 2.43]    |
| Presence of diabetes mellitus                                                                       | 1.68 [1.35, 2.10]    |
| Presence of diseases of respiratory system                                                          | 1.53 [1.23, 1.89]    |
| Presence of neuropsychiatric disorders                                                              | 2.69 [2.29, 3.16]    |
| Presence of other diseases                                                                          | 2.44 [2.08, 2.86]    |
| Presence of hypertension                                                                            | 0.92 [0.65, 1.31]    |

*Persistent short nighttime sleep duration is associated with a greater post-COVID risk in fully mRNA-vaccinated individuals (Supplement)*

**Supplemental Table S6:** Association of habitual nighttime sleep duration with post-COVID among those who received two mRNA vaccinations (defining 7-9 hours of nighttime sleep as the normal sleep duration category)

| Nighttime sleep duration | n    | Post-COVID, n (%) | OR [95%-CI]       |                             |
|--------------------------|------|-------------------|-------------------|-----------------------------|
|                          |      |                   | Unadjusted Model  | Adjusted Model <sup>1</sup> |
| 7-9 hours                | 3021 | 575 (19.0)        | 1 [ref]           | 1 [ref]                     |
| <7 hours                 | 2702 | 661 (24.5)        | 1.38 [1.21, 1.56] | 1.29 [1.11, 1.50]           |
| >9 hours                 | 195  | 84 (43.1)         | 3.22 [2.39, 4.34] | 1.95 [1.37, 2.78]           |

<sup>1</sup>adjusted for: participants' age, gender, ethnicity, test positivity status, time elapsed since first mRNA vaccination, smoking status, weekly alcohol consumption, educational level, marital status, living area, the weekly physical activity level status, presence of obesity/hypertension/diseases of the circulatory system/diabetes mellitus/diseases of respiratory system/neuropsychiatric disorders/other disease
